# Supplementary material for: Unravelling the interplay of ecological processes structuring the bacterial rare biosphere
Source: PubMed Central journal article supplement (PMC9723687; doi:10.1038/s43705-022-00177-6), 2022-10-03
Supplement: 43705_2022_177_MOESM2_ESM.pdf [file 43705_2022_177_MOESM2_ESM.pdf]

# 1 **Supplementary material**

## 2 **Unravelling the interplay of ecological processes shaping the bacterial rare biosphere**

3 Xiu Jia, Francisco Dini-Andreote, Joana Falcão Salles

4

### 5 **Methods**

#### 6 **Soil sampling**

7 Soil samples were collected across five successional stages (i.e. 0, 10, 40, 70 and 110 years of development from  
8 1809 to 2017) of a well-characterized soil chronosequence located on the island of Schiermonnikoog, the  
9 Netherlands (53°30' N, 6°10' E) in May, July, September and November 2017 [1]. Similar sampling sites and  
10 times were used in previous studies [2, 3]. At each successional stage, we established three replicate plots (5 × 5  
11 m). At each plot, we randomly sampled 20 soil cores (top 10 cm), which were homogenized and used as one pooled  
12 sample per plot. A total of 2 g of each homogenized soil sample per plot was directly preserved in LifeGuard Soil  
13 Preservation Solution (Qiagen, Germany) for further RNA extraction. Preserved soil samples were stored at -80°C  
14 prior to RNA extraction.

15

#### 16 **RNA isolation, cDNA synthesis and bacterial 16S rRNA sequencing**

17 To capture the putatively 'active' bacterial (i.e. excluding relic DNA) from soil, soil RNA extractions were carried  
18 out using the RNeasy PowerSoil Total RNA kit (Qiagen, Germany), following the manufacturer's instructions.  
19 DNA was digested from RNA samples using the DNase Max kit (Qiagen, Germany). The DNA-free RNA was  
20 reverse transcribed into cDNA using the Transcriptor High Fidelity cDNA Synthesis Kit (Roche, Switzerland).  
21 The cDNA samples were then purified using the MinElute PCR Purification Kit (Qiagen, Germany). The  
22 concentration of cDNA was quantified using NanoDrop 2000 Spectrophotometer (Thermo Scientific, USA).

23

24 Bacterial community profiling was carried out by sequencing the 16S rRNA from the cDNA samples. The V4  
25 region of bacterial 16S rRNA was amplified using the primer set 515F (5'-GTGCCAGCMGCCGCGGTAA-3')  
26 and 806R (5'-GGACTACHVGGGTWTCTA-AT-3'), in accordance with the Earth Microbiome Project [4, 5]. For  
27 this, each sample was given a 12-base barcode sequence that linked on the forward primer. PCR assays were  
28 performed in 25 µL of PCR with 1 µL of template DNA, 1 µL of each primer (final concentration 200 pM), 9.5  
29 µL of MOBIO PCR water and 12.5 µL of QuantaBio's AccuStart II PCR ToughMix (final concentration 1×). PCR  
30 started with 3 minutes at 94 °C followed by 23 cycles at 94 °C for 45 s, 50 °C for 60 s, and 72 °C for 90 s, with a  
31 final extension at 72 °C for 10 min. PCR products were quantified using PicoGreen (Invitrogen, USA) and pooled  
32 in a tube using equimolar concentrations of each sample. The sample pool was purified using AMPure XP Beads  
33 (Beckman Coulter, USA), and quantified by a Qubit fluorometer (Invitrogen, USA). Pooled amplicons were  
34 diluted to 2 nM, denatured, and then diluted to a final concentration of 6.75 pM with a 10% PhiX spike for  
35 increasing the diversity of our library. Sequencing was performed on a 151bp × 12bp × 151bp Illumina MiSeq run  
36 (Illumina, USA) at the Environmental Sample Preparation and Sequencing Facility (ESPSF) at Argonne National  
37 Laboratory using the Version 2 chemistry sequencing reagent kit [4]. All 16S rRNA sequence data analyzed in  
38 this study were deposited at the Sequence Read Archive of the National Center for Biotechnology information  
39 with the accession numbers PRJNA546612 (<http://www.ncbi.nlm.nih.gov/Traces/sra>)[1].

40 **Supplementary Figures**

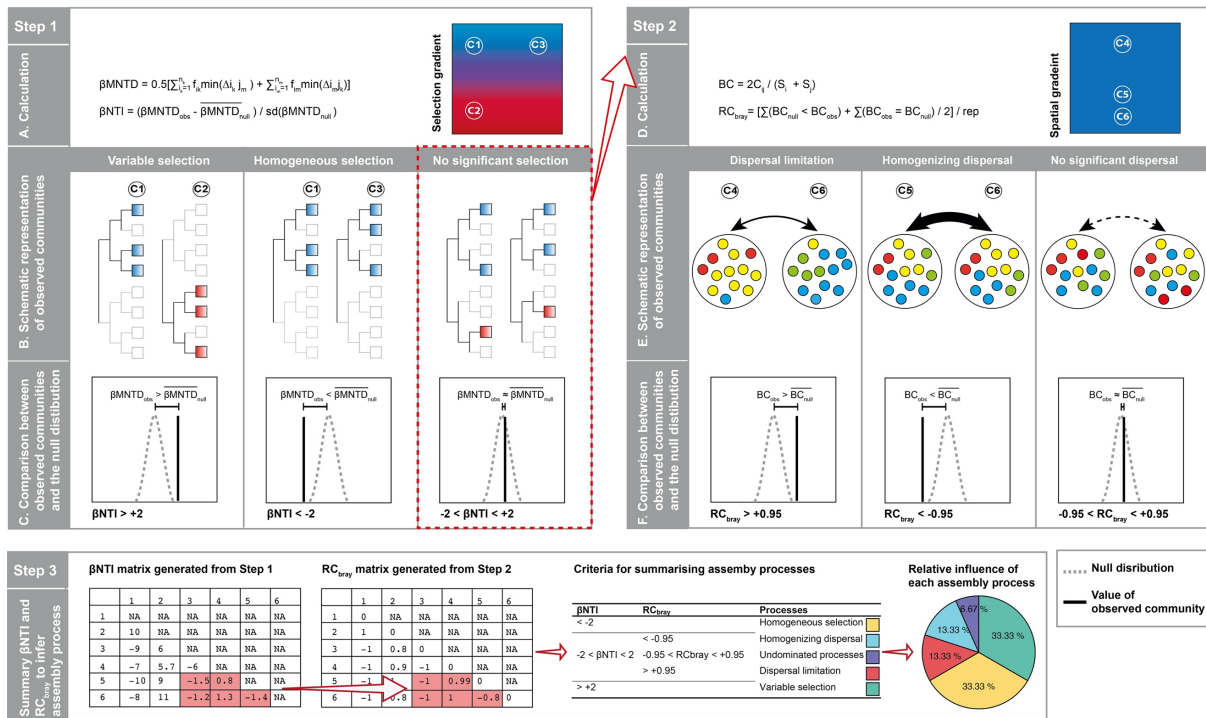

41

42 **Figure 1** Methodological framework to calculate the relative influences of distinct assembly processes, using  
 43 phylogenetic (Step 1) and taxonomic (Step 2) distribution (modified from Stegen *et al.* [6, 7]). In Step1 (upper left  
 44 panel), **(A)** selection is inferred by the deviation of  $\beta\text{MNTD}_{\text{obs}}$  from  $\beta\text{MNTD}_{\text{null}}$  (i.e.  $\beta\text{NTI}$  value). **(B, C)**  $\beta\text{MNTD}_{\text{obs}}$   
 45 (solid black lines) represents the phylogenetic distance between a given pair of communities, whereas  $\beta\text{MNTD}_{\text{null}}$   
 46 (dashed grey lines) indicates the null distribution of phylogenetic turnover, generated by shuffling species in the  
 47 tips of the phylogenetic tree. The predominance of variable selection leads to distinct phylogenetic species  
 48 composition between two communities, e.g. communities C1 and C2 that dwell in distinct environmental  
 49 conditions (illustrated in the upper right corner). In this case, the phylogenetic distance of observed communities  
 50 ( $\beta\text{MNTD}_{\text{obs}}$ ) is higher than that of the null distribution ( $\beta\text{MNTD}_{\text{null}}$ ), i.e.  $\beta\text{NTI} > +2$ . Homogeneous selection (e.g.  
 51 communities C1 and C3) generates a similar phylogenetic structure between observed communities in comparison  
 52 with the null expectation, i.e.  $\beta\text{NTI} < -2$ . Non-significant deviation of  $\beta\text{MNTD}$  between observed communities  
 53 and the null distribution indicates the absence of selection, i.e. that dispersal and/or drift processes govern  
 54 community turnover ( $-2 < \beta\text{NTI} < +2$ ). In Step2 (upper right panel), **(D)** dispersal and/or drift are further quantified  
 55 by the Bray-Curtis (BC) based Raup-Crick ( $\text{RC}_{\text{bray}}$ ). **(E, F)** This is done by calculating the deviation in the  
 56 taxonomic difference (Bray-Curtis) between a given pair of observed communities ( $\text{BC}_{\text{obs}}$ , solid black lines) and  
 57 a randomly sampled distribution ( $\text{BC}_{\text{null}}$ , dashed grey lines). Dispersal limitation leads to a significant distinct  
 58 community composition between a given pair of communities (e.g. communities C4 and C6), i.e.  $\text{RC}_{\text{bray}} > +0.95$ .  
 59 On the contrary, the predominance of homogenizing dispersal generates a significant clustering between a given  
 60 pair of communities (e.g. communities C5 and C6), i.e.  $\text{RC}_{\text{bray}} < -0.95$ . When neither selection nor dispersal is  
 61 significant, i.e. neither  $\beta\text{NTI}$  nor  $\text{RC}_{\text{bray}}$  are significantly different from the null distribution, the combination of  
 62 drift, dispersal and selection (termed as undominated processes) is responsible for the random pattern in  
 63 community turnover. In Step 3 (lower panel), the  $\beta\text{NTI}$  and  $\text{RC}_{\text{bray}}$  matrices acquired from Step 1 and Step 2,  
 64 are used to calculate the fraction of pairwise comparisons with significant values, which infer the relative influences  
 65 of distinct assembly processes. In steps 1 and 2, circles with numbers indicate communities located in different  
 66 locations and/or environmental gradients.

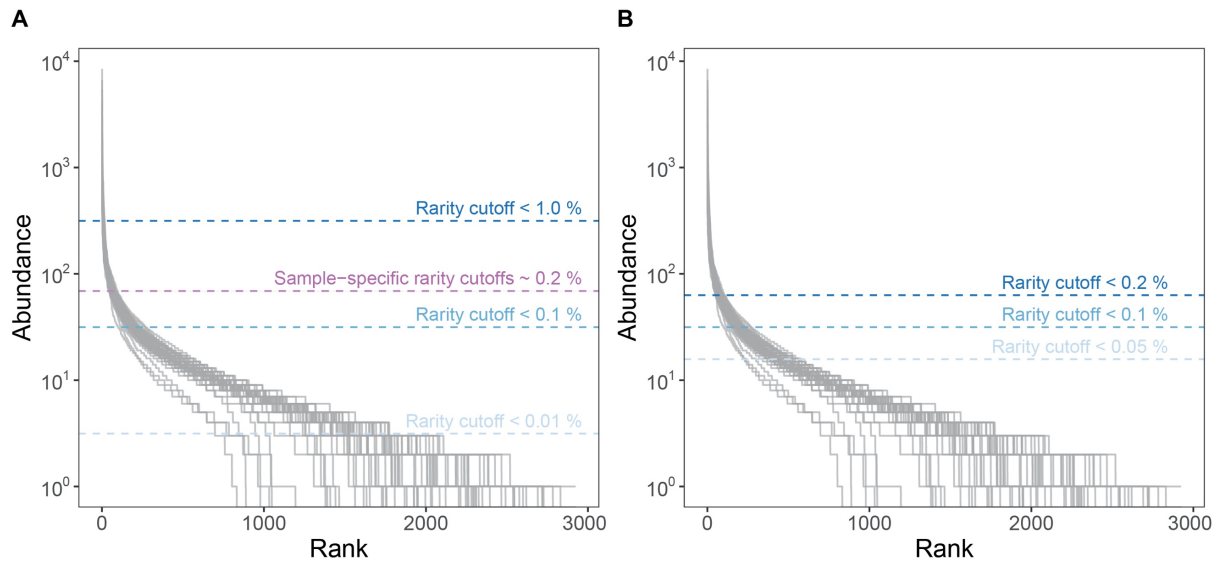

67

68 **Figure 2** Rarity cutoff values based on the rank abundance curves of all samples (grey lines). The x-axis displays  
 69 the abundance of amplicon sequence variants (ASVs) on a log scale, and the y-axis displays the rank of their  
 70 abundances. The rarity cutoff values are shown as dashed lines and their respective percentages are indicated in  
 71 the panels. (A) Rarity cutoff values are commonly used in the literature (1.0%, 0.1% and 0.01%; blue lines, e.g.  
 72 ref. [8-11]) and their fit on our dataset. The orange line indicates the average of sample-specific cutoff, i.e. 0.2%  
 73 (for further detail, see Figure 5). (B) Distinct rarity cutoff values were tested in this study (0.2%, 0.1% and 0.05%;  
 74 blue lines).

75

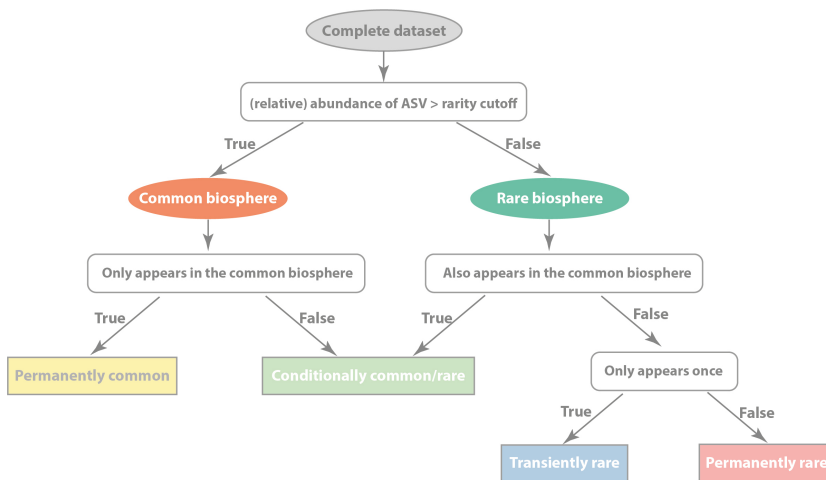

76

77 **Figure 3** Workflow for defining the common and rare biospheres and classifying the different types of rarity and  
 78 commonness, i.e. permanently common, conditionally rare/common, transiently rare and permanently rare.

79

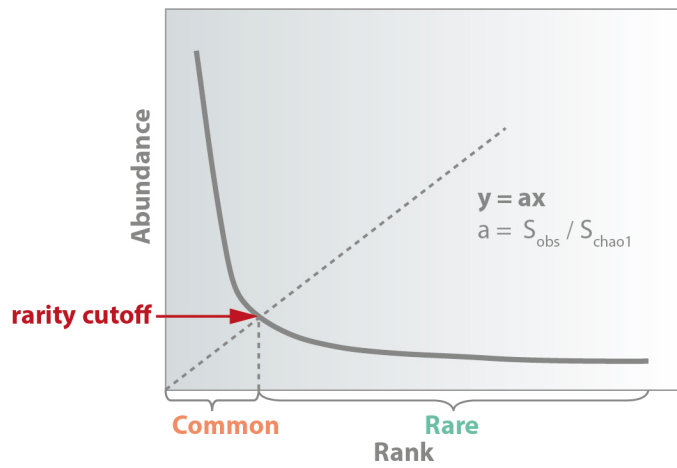

80

81 **Figure 4** Conceptual figure displaying the method used to define the sample-specific rarity cutoff based on the  
 82 rank abundance curve of a community (green line). Species with abundances above the intercept line ( $y = ax$ ,  
 83 orange line) are classified as common, and those below as rare. The slope of the intercept line ( $a$ ) represents the  
 84 sequencing depth, i.e. the ratio of the value of observed species ( $S_{\text{obs}}$ ) to the value of the estimated species ( $S_{\text{chao1}}$ ).

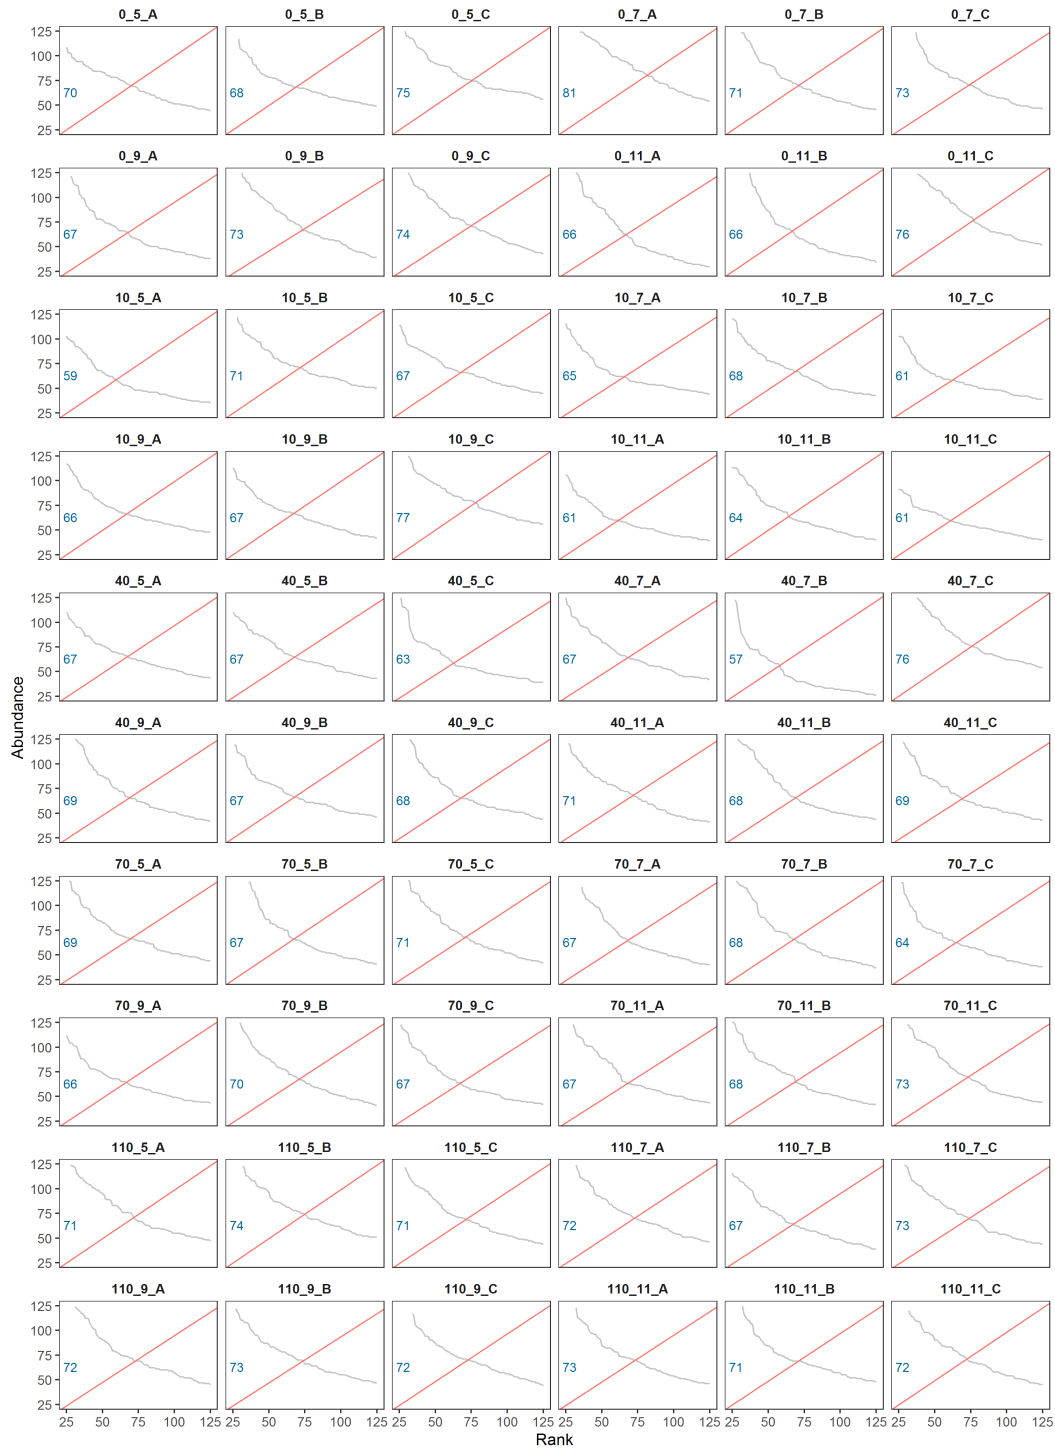

85

86 **Figure 5** Panels displaying the sample-specific rarity cutoffs of each individual sample in our dataset. The sample-  
 87 specific rarity cutoff values are set between 57 and 81 reads (numbers in blue). ASVs with read counts below these  
 88 values are defined as rare, and those above as common. The average of the sample-specific rarity cutoffs is 69  
 89 reads, which equals to 0.2% of the total abundance per sample. This value is based on a rarified ASV table at  
 90 31,500 reads per sample. Partial of the rank abundance curve in each sample is shown by grey lines. Red lines  
 91 indicate the recalibrated intercept used to identify the sample-specific rarity cutoffs. Sample IDs on top of the  
 92 panels indicate the successional stage, sampling month, and replicate (separated by underscores).

93

94

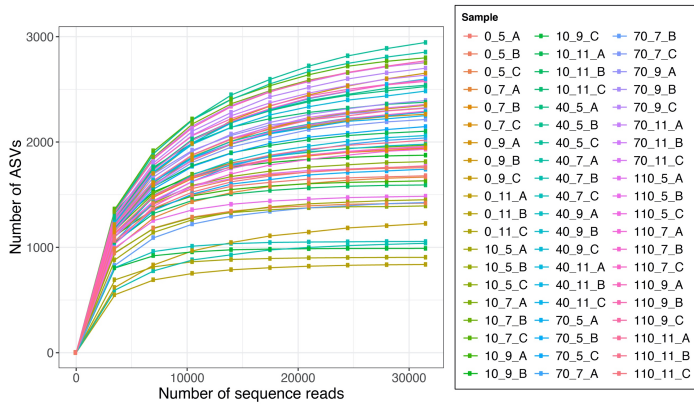

95

96 **Figure 6** Rarefaction curves of individual samples. Curves are visualized by the observed number of amplicon  
 97 sequence variance (ASVs) against the number of sequence reads. Lines with different colors indicate different  
 98 samples/communities. Sample IDs in the legend indicate the successional stage, sampling month, and replicate  
 99 (separated by underscores).

100

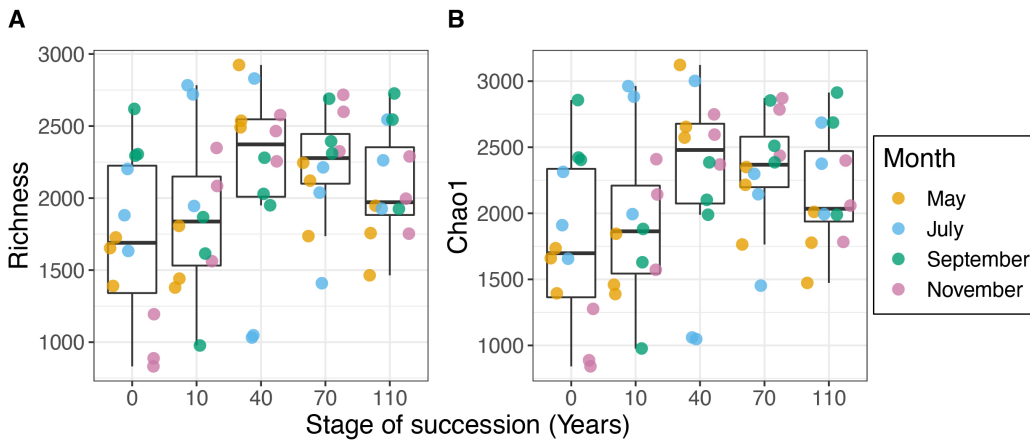

101

102 **Figure 7** Box plots displaying  $\alpha$ -diversity indices (i.e. richness, Chao1). Median values and interquartile ranges  
 103 are indicated in the plots. The panels display values across successional stages (i.e. 0, 10, 40, 70 and 110 years)  
 104 and sampling time (i.e. May, July, September and November).

105

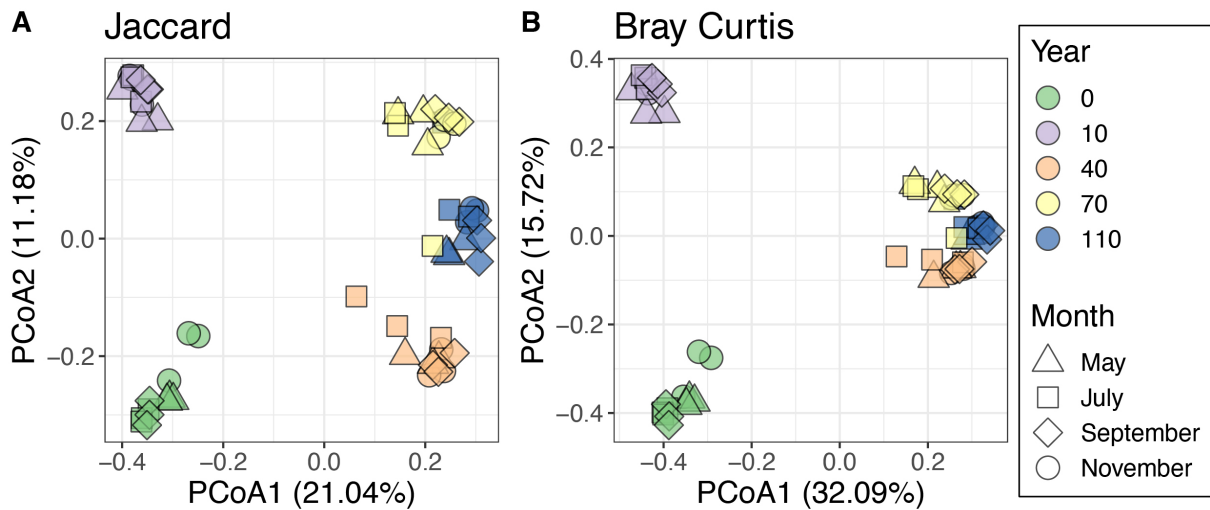

106

107 **Figure 8** Principal Coordinate Analyses (PCoA) displaying bacterial community  $\beta$ -diversities across successional stages (i.e. 0, 10, 40, 70 and 110 years) and sampling time (i.e. May, July, September and November). (A) PCoA  
 108 plot based on Jaccard distances. (B) PCoA plot based on Bray-Curtis distances.  
 109

110

111

112

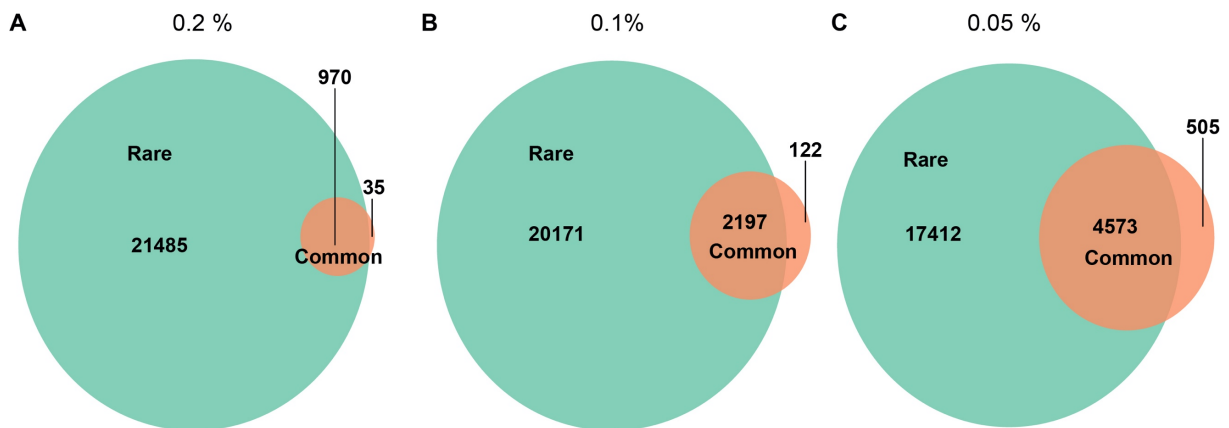

113

114 **Figure 9** Venn diagrams indicating the number of amplicon sequence variants (ASVs) in the rare (green circle)  
 115 and common (orange circle) biospheres. Values are shown at rarity cutoffs of (A) 0.2%, (B) 0.1% and (C) 0.05%.

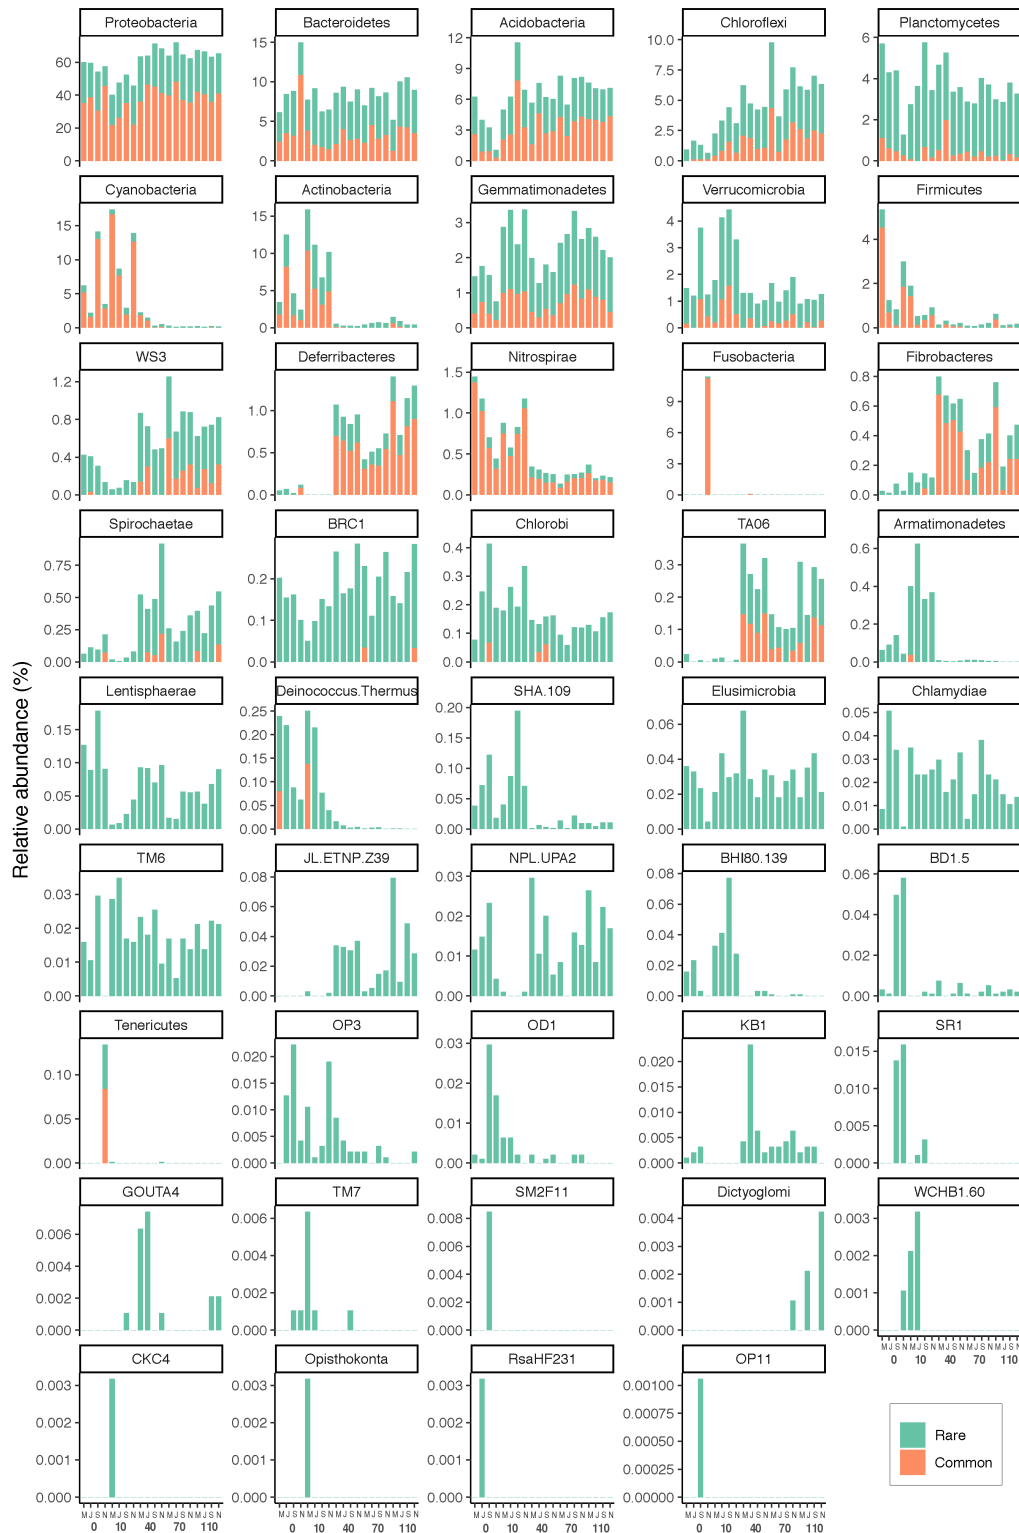

116

117 **Figure 10** Bar charts displaying the relative abundances of rare and common species per bacterial phyla (green  
 118 and orange bars, respectively). The rare and common biospheres were defined by the rarity cutoff of 0.1%. The  
 119 height of each bar represents the average relative abundance of each phylum in the corresponding sampling group.  
 120 The x-axis displays the sampling time (M-May, J-July, S-September and N-November) and successional stage (0,  
 121 10, 40, 70 and 110 years), and the y-axis displays the relative abundances (in %).

122



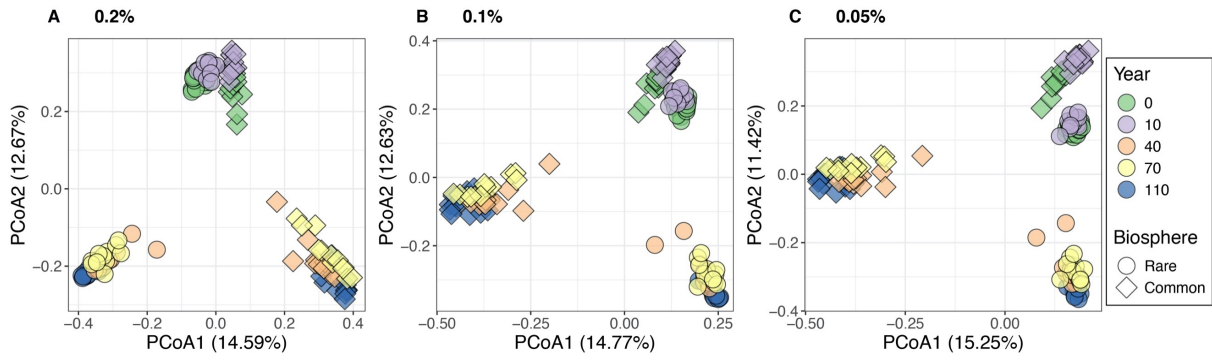

123

124 **Figure 11** Principal Coordinate analyses (PCoA) based on Bray-Curtis distances of bacterial communities across  
 125 successional stages (i.e. 0, 10, 40, 70 and 110 years), separated by the rare and common biospheres. Each plot  
 126 displays the result at a different cutoff value: (A) 0.2%, (B) 0.1% and (C) 0.05%.

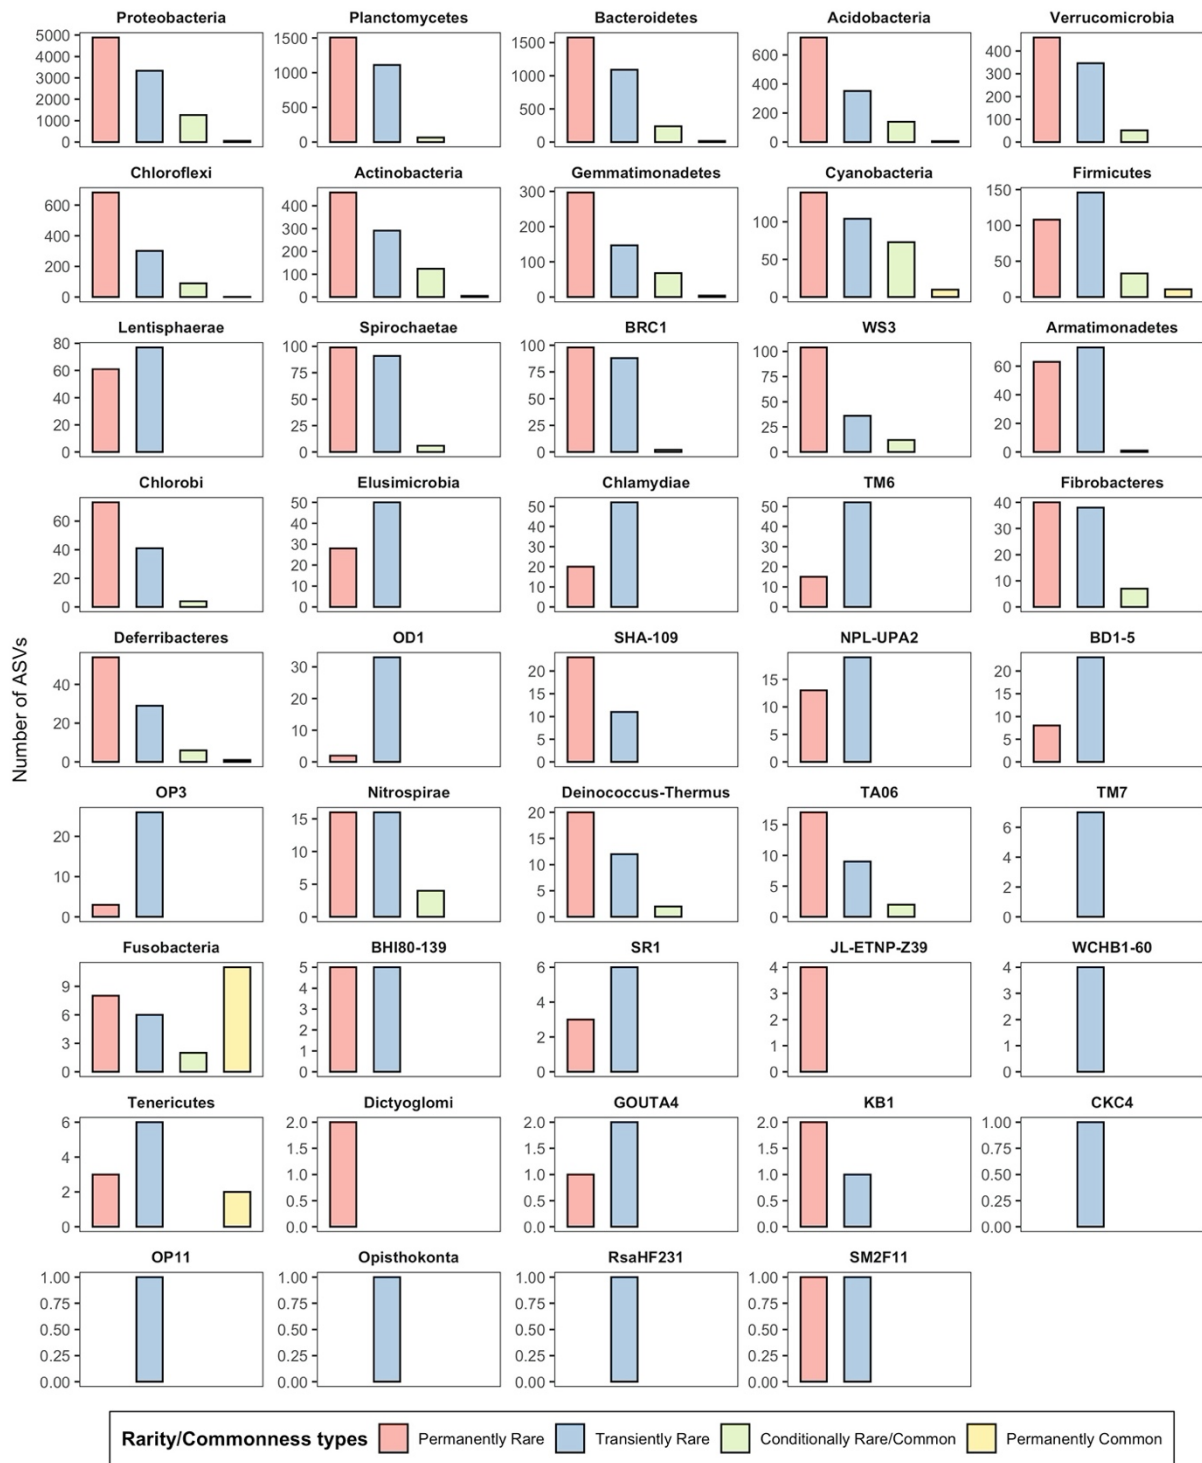

127

128

129

130

**Figure 12** Bar charts displaying the number of amplicon sequence variants (ASVs) in each type of rarity and commonness per bacterial phylum. The rare and common biospheres were defined at the rarity cutoff of 0.1%. The height of each bar represents the number of ASVs.

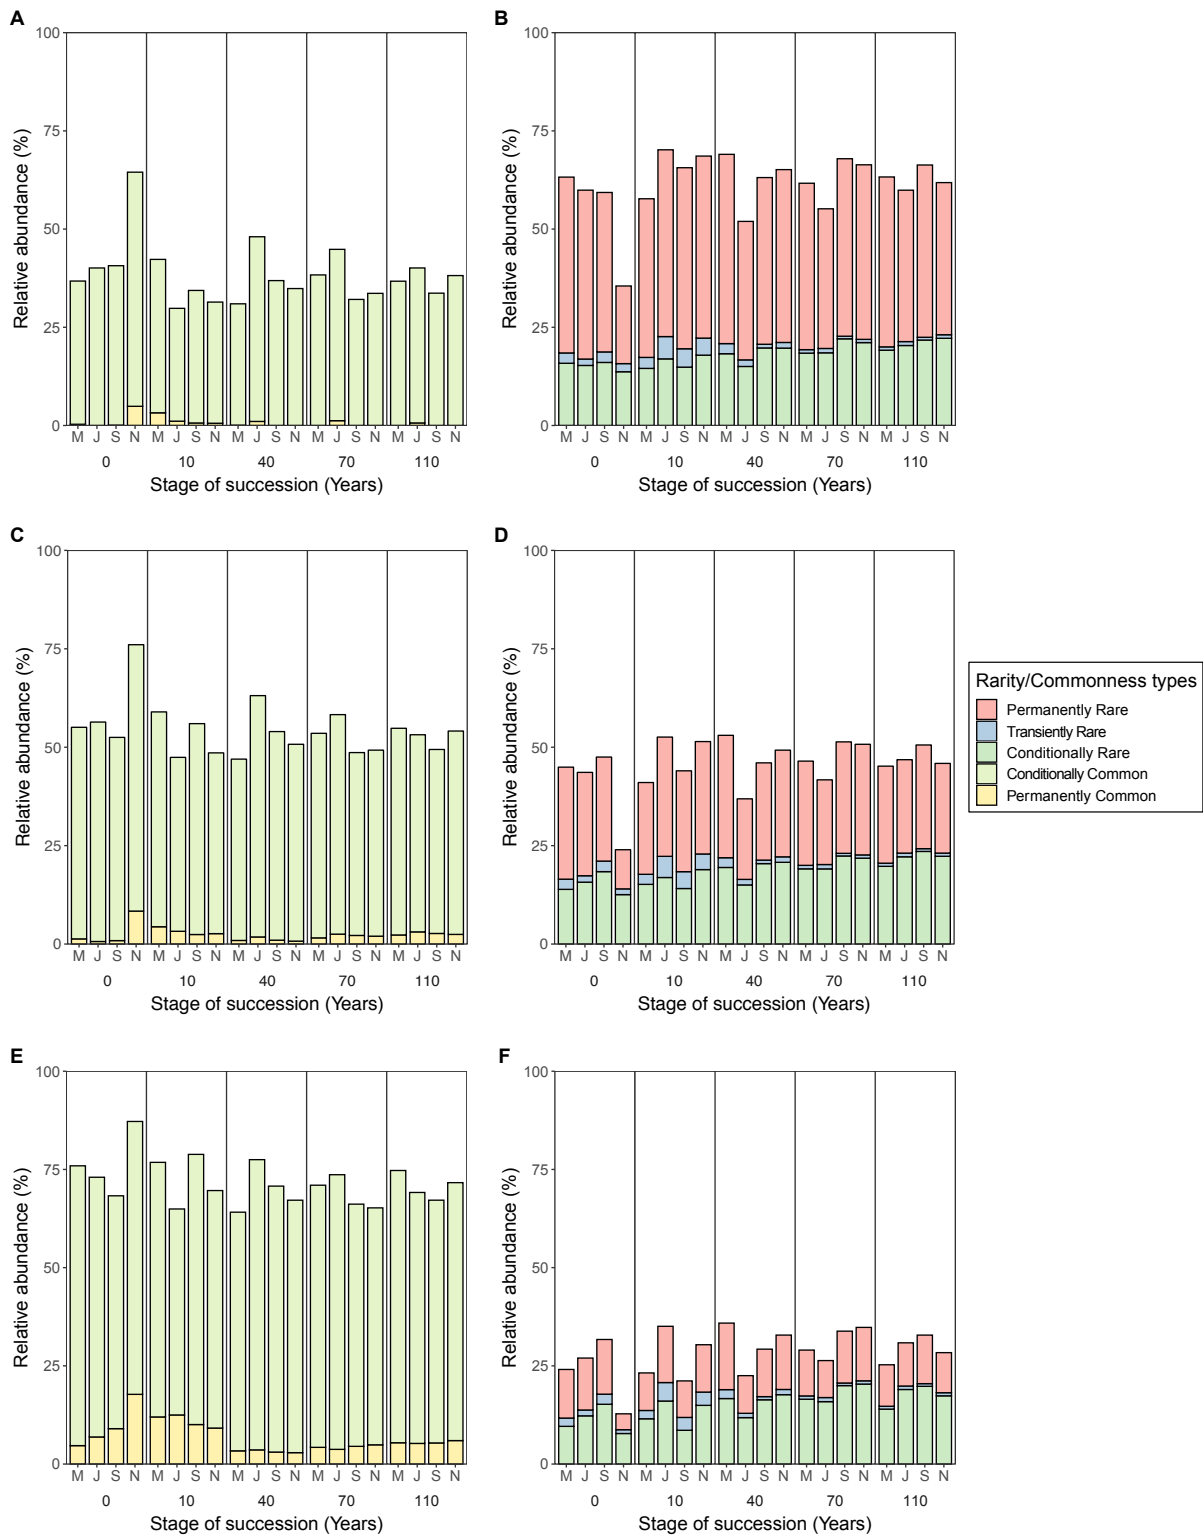

131

132 **Figure 13** Bar charts displaying the relative abundance of each type of commonness (A, C and E) and rarity (B,  
 133 D and F). The plots display changes across five successional stages (0, 10, 40, 70 and 110 years) and four sampling  
 134 times (M-May, J-July, S-September, N-November). The common and rare biospheres are shown at distinct rarity  
 135 cutoffs: (A, B) 0.2%, (C, D) 0.1%, and (E, F) 0.05%.

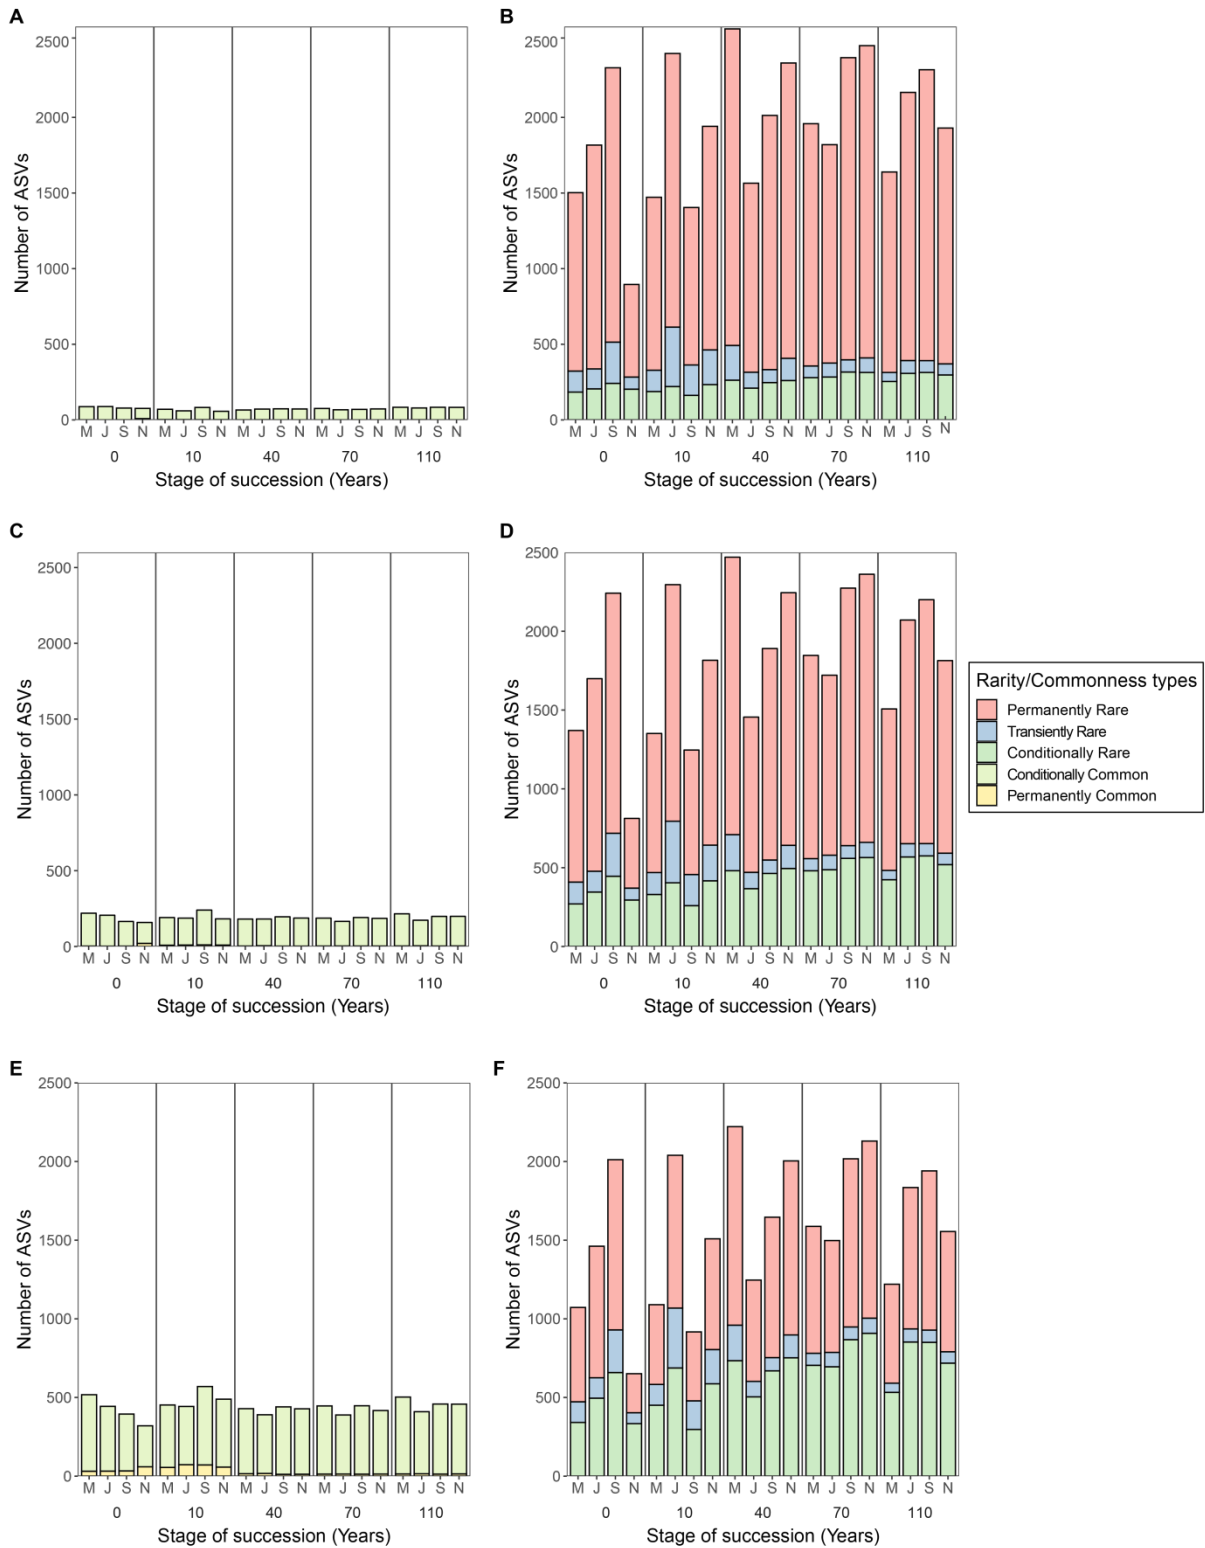

136

137 **Figure 14** Bar charts displaying the number of ASVs of each type of commonness (A, C and E) and rarity (B, D  
 138 and F). The plots display changes across five successional stages (0, 10, 40, 70 and 110 years) and four sampling  
 139 times (M-May, J-July, S-September, N-November). The common and rare biospheres are shown at distinct rarity  
 140 cutoffs: (A, B) 0.2%, (C, D) 0.1%, and (E, F) 0.05%.

141

142

**A The common biosphere**

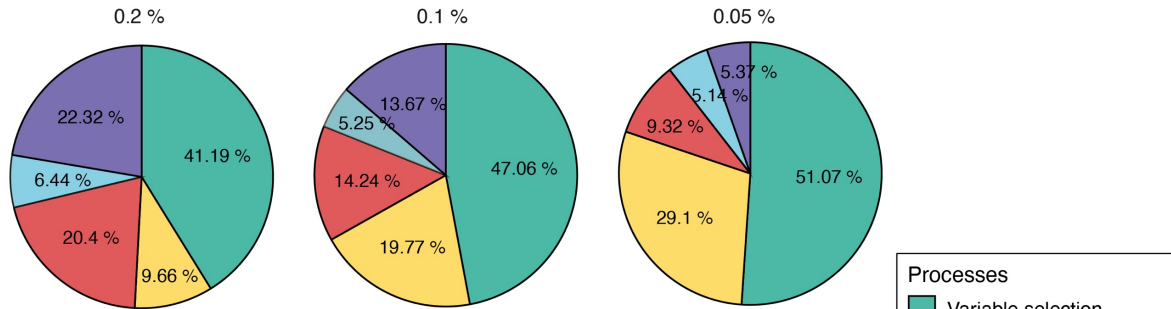

**B The rare biosphere**

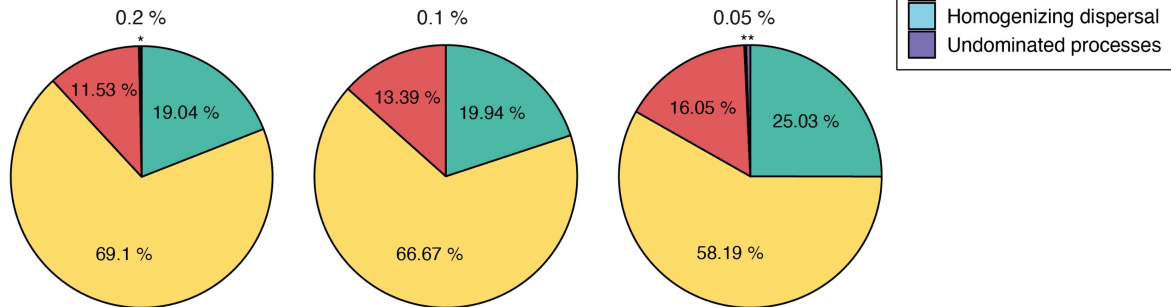

143  
144  
145  
146  
147  
148  
149

**Figure 15** Plots displaying the relative influences of distinct assembly processes structuring the common (upper panel) and rare (lower panel) biospheres at different rarity cutoff values (0.2%, 0.1% and 0.05%). \*indicates the relative influences of homogenizing dispersal (0.23%) and undominated processes (0.11%) for the rare biosphere at the rarity cutoff of 0.2%. \*\*indicates the relative influences of homogenizing dispersal (0.23%) and undominated processes (0.51%) for the rare biosphere at the rarity cutoff of 0.05%.

**Complete community**

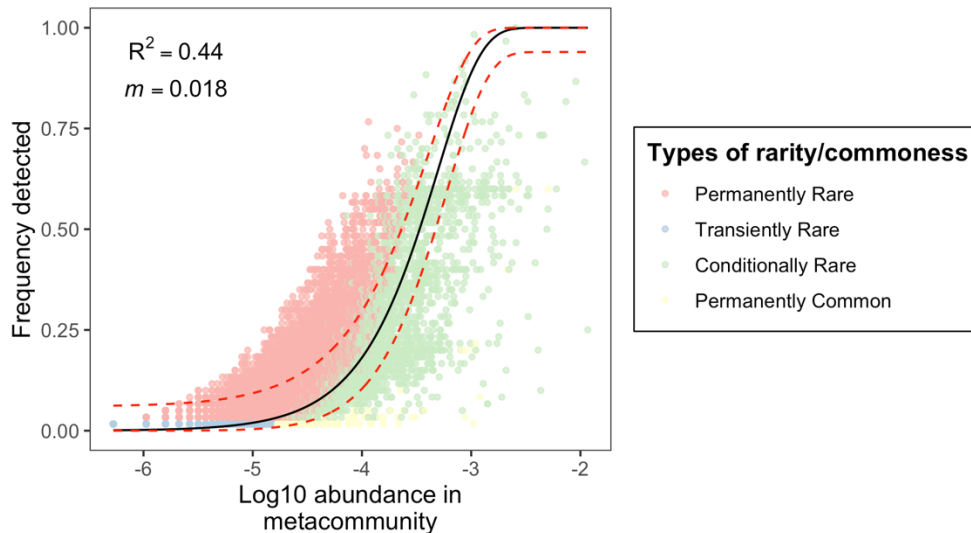

150  
151  
152  
153  
154  
155  
156  
157

**Figure 16** The scatter plots show the observed abundance-occurrence relationship from the Sloan's neutral model. The frequency of detected ASVs was plotted against their average relative abundance in the entire metacommunity. Dots represent different ASVs. The classification of ASVs to different types of rarity and commonness were shown in different colors. Solid lines present the model prediction of predicted occurrence of ASV at different abundance. Dashed lines represent 95% confidence intervals of the model.  $R^2$  means the fit of the model, while  $m$  indicates the immigration rates, i.e., the possibility the space vacated by the death of an individual is filled by an immigrant.

158 **Supplementary Tables**

159 **Table 1** Permutational multivariate analysis of variance (PERMANOVA) results showing the influence of  
 160 successional stage (Year), sampling time (Month) and their interaction on the community  $\beta$ -diversity, based on  
 161 (A) Jaccard distances and (B) Bray-Curtis distances, respectively.

|                        | Df | Sums of Sqs | Mean Sqs | Pseudo-F | $R^2$    | $Pr(>F)$ |
|------------------------|----|-------------|----------|----------|----------|----------|
| <b>(A) Jaccard</b>     |    |             |          |          |          |          |
| <b>Year</b>            | 4  | 10.40741    | 2.601853 | 14.87203 | 0.44966  | 1.00E-04 |
| <b>Month</b>           | 3  | 1.311632    | 0.437211 | 2.49907  | 0.05667  | 2.00E-04 |
| <b>Year:Month</b>      | 12 | 4.428039    | 0.369003 | 2.1092   | 0.191317 | 1.00E-04 |
| <b>Residuals</b>       | 40 | 6.997974    | 0.174949 |          | 0.302353 |          |
| <b>Total</b>           | 59 | 23.14506    |          |          | 1        |          |
| <b>(B) Bray-Curtis</b> |    |             |          |          |          |          |
| <b>Year</b>            | 4  | 12.31698    | 3.079246 | 32.22555 | 0.611171 | 1.00E-04 |
| <b>Month</b>           | 3  | 0.997447    | 0.332482 | 3.479561 | 0.049493 | 2.00E-04 |
| <b>Year:Month</b>      | 12 | 3.016551    | 0.251379 | 2.630784 | 0.149682 | 1.00E-04 |
| <b>Residuals</b>       | 40 | 3.822118    | 0.095553 |          | 0.189654 |          |
| <b>Total</b>           | 59 | 20.1531     |          |          | 1        |          |

162 Df - degrees of freedom; Sum of Sq - sum of squares; Mean Sqs - mean of squares; Pseudo-F - F value by  
 163 permutation;  $R^2$  - explained variation;  $P$ -values based on 9999 permutations

164

165 **Table 2** Permutational multivariate analysis of variance (PERMANOVA) results based on Bray-Curtis distances  
 166 of the bacterial rare and common biospheres. Results are shown at distinct rarity cutoff values: (A) 0.2%, (B) 0.1%,  
 167 and (C) 0.05%.

|                             | Df  | Sums of Sqs | Mean Sqs   | Pseudo-F   | R <sup>2</sup> | Pr(>F)   |
|-----------------------------|-----|-------------|------------|------------|----------------|----------|
| <b>(A) 0.2%</b>             |     |             |            |            |                |          |
| <b>Biosphere</b>            | 1   | 6.4850559   | 6.4850559  | 52.4431834 | 0.13034791     | 1.00E-04 |
| <b>Month</b>                | 3   | 1.00684347  | 0.33561449 | 2.71403863 | 0.02023729     | 1.00E-04 |
| <b>Year</b>                 | 4   | 13.4257716  | 3.3564429  | 27.1427962 | 0.26985446     | 1.00E-04 |
| <b>Biosphere:Month</b>      | 3   | 1.37958957  | 0.45986319 | 3.71880982 | 0.02772939     | 1.00E-04 |
| <b>Biosphere:Year</b>       | 4   | 10.0923473  | 2.52308682 | 20.4036337 | 0.20285352     | 1.00E-04 |
| <b>Month:Year</b>           | 12  | 2.88311531  | 0.24025961 | 1.94292523 | 0.05794986     | 1.00E-04 |
| <b>Biosphere:Month:Year</b> | 12  | 4.58647814  | 0.38220651 | 3.0908178  | 0.092187       | 1.00E-04 |
| <b>Residuals</b>            | 80  | 9.89269603  | 0.1236587  |            | 0.19884058     |          |
| <b>Total</b>                | 119 | 49.7518973  |            |            | 1              |          |
| <b>(B) 0.1%</b>             |     |             |            |            |                |          |
| <b>Biosphere</b>            | 1   | 6.18931504  | 6.18931504 | 46.5730208 | 0.1249375      | 1.00E-04 |
| <b>Month</b>                | 3   | 0.93622446  | 0.31207482 | 2.3482836  | 0.01889863     | 1.00E-04 |
| <b>Year</b>                 | 4   | 13.2813853  | 3.32034634 | 24.9847613 | 0.26809802     | 1.00E-04 |
| <b>Biosphere:Month</b>      | 3   | 1.39579551  | 0.46526517 | 3.50100201 | 0.02817553     | 1.00E-04 |
| <b>Biosphere:Year</b>       | 4   | 9.68026754  | 2.42006688 | 18.2103875 | 0.19540586     | 1.00E-04 |
| <b>Month:Year</b>           | 12  | 2.75092876  | 0.22924406 | 1.72500325 | 0.05553024     | 1.00E-04 |
| <b>Biosphere:Month:Year</b> | 12  | 4.67378378  | 0.38948198 | 2.93075281 | 0.09434499     | 1.00E-04 |
| <b>Residuals</b>            | 80  | 10.6315887  | 0.13289486 |            | 0.21460923     |          |
| <b>Total</b>                | 119 | 49.5392892  |            |            | 1              |          |
| <b>(C) 0.05%</b>            |     |             |            |            |                |          |
| <b>Biosphere</b>            | 1   | 5.98764676  | 5.98764676 | 38.1873866 | 0.11933411     | 1.00E-04 |
| <b>Month</b>                | 3   | 0.97398009  | 0.32466003 | 2.07058275 | 0.01941147     | 3.00E-04 |
| <b>Year</b>                 | 4   | 12.4079705  | 3.10199262 | 19.7835638 | 0.24729149     | 1.00E-04 |
| <b>Biosphere:Month</b>      | 3   | 1.34283206  | 0.44761069 | 2.85472457 | 0.02676271     | 1.00E-04 |
| <b>Biosphere:Year</b>       | 4   | 9.27146817  | 2.31786704 | 14.7826498 | 0.18478084     | 1.00E-04 |
| <b>Month:Year</b>           | 12  | 3.02840307  | 0.25236692 | 1.60951934 | 0.06035623     | 1.00E-04 |
| <b>Biosphere:Month:Year</b> | 12  | 4.61946812  | 0.38495568 | 2.45513001 | 0.09206624     | 1.00E-04 |
| <b>Residuals</b>            | 80  | 12.5437162  | 0.15679645 |            | 0.24999691     |          |
| <b>Total</b>                | 119 | 50.175485   |            |            | 1              |          |

168 Df - degrees of freedom; Sum of Sq - sum of squares; Mean Sqs - mean of squares; Pseudo-F - F value by  
 169 permutation; R<sup>2</sup> - explained variation; P-values based on 9999 permutations

170  
 171

172  
173

**Table 3** Summary table displaying the percentage and richness of each type of commonness and rarity at distinct cutoff values (0.2%, 0.1%, and 0.05%).

| Rarity cutoff | Biosphere | Types of rarity/commonness | Proportion in each biosphere (relative abundance) | Number of ASVs in each biosphere |
|---------------|-----------|----------------------------|---------------------------------------------------|----------------------------------|
| 0.2%          | Rare      | Permanently rare           | 66.92 ± 0.65%                                     | 1560.95 ± 59.27                  |
|               |           | Transiently rare           | 3.33 ± 0.36%                                      | 139.88 ± 12.85                   |
|               |           | Conditionally rare         | 29.75 ± 0.67%                                     | 249.25 ± 7.04                    |
|               | Common    | Conditionally common       | 98.54 ± 0.43%                                     | 73.88 ± 1.69                     |
|               |           | Permanently common         | 1.46 ± 0.43%                                      | 0.98 ± 0.30                      |
|               |           | Permanently rare           | 54.73 ± 0.85%                                     | 1258.00 ± 52.66                  |
| 0.1%          | Rare      | Transiently rare           | 4.14 ± 0.42%                                      | 138.88 ± 12.78                   |
|               |           | Conditionally rare         | 41.13 ± 0.96%                                     | 437.37 ± 14.85                   |
|               |           | Conditionally common       | 95.84 ± 0.41%                                     | 185.42 ± 4.06                    |
|               | Common    | Permanently common         | 4.16 ± 0.41%                                      | 5.25 ± 0.69                      |
|               |           | Permanently rare           | 40.96 ± 0.88%                                     | 815.42 ± 40.01                   |
|               |           | Transiently rare           | 5.93 ± 0.58%                                      | 135.17 ± 12.41                   |
| 0.05%         | Rare      | Conditionally rare         | 53.11 ± 1.13%                                     | 632 ± 27.24                      |
|               |           | Conditionally common       | 90.77 ± 0.66%                                     | 413.42 ± 8.62                    |
|               |           | Permanently common         | 9.23 ± 0.66%                                      | 28.88 ± 2.88                     |

174



175 **References**

- 176 1. Jia X, Dini-Andreote F, Salles JF. Comparing the influence of assembly processes governing bacterial  
177 community succession based on DNA and RNA data. *Microorganisms*. 2020;accepted.
- 178 2. Dini-Andreote F, Pylro VS, Baldrian P, van Elsas JD, Salles JF. Ecological succession reveals potential  
179 signatures of marine–terrestrial transition in salt marsh fungal communities. *ISME J*. 2016;10:1984–97.
- 180 3. Dini-Andreote F, Silva M, Triado-Margarit X, Casamayor EO, van Elsas JD, Salles JF. Dynamics of  
181 bacterial community succession in a salt marsh chronosequence: evidences for temporal niche  
182 partitioning. *ISME J*. 2014;8(10):1989-2001; doi: 10.1038/ismej.2014.54.
- 183 4. Caporaso JG, Lauber CL, Walters WA, Berg-Lyons D, Lozupone CA, Turnbaugh PJ, et al. Global  
184 patterns of 16S rRNA diversity at a depth of millions of sequences per sample. *Proc Natl Acad Sci USA*.  
185 2011;108(Supplement 1):4516-22; doi: 10.1073/pnas.1000080107.
- 186 5. Caporaso JG, Lauber CL, Walters WA, Berg-Lyons D, Huntley J, Fierer N, et al. Ultra-high-throughput  
187 microbial community analysis on the Illumina HiSeq and MiSeq platforms. *ISME J*. 2012;6(8):1621-4.
- 188 6. Stegen JC, Lin X, Fredrickson JK, Chen X, Kennedy DW, Murray CJ, et al. Quantifying community  
189 assembly processes and identifying features that impose them. *ISME J*. 2013;7(11):2069-79; doi:  
190 10.1038/ismej.2013.93.
- 191 7. Stegen JC, Lin X, Fredrickson JK, Konopka AE. Estimating and mapping ecological processes  
192 influencing microbial community assembly. *Front Microbiol*. 2015;6;doi: 10.3389/fmicb.2015.00370;  
193 doi: 10.3389/fmicb.2015.00370.
- 194 8. Galand PE, Casamayor EO, Kirchman DL, Lovejoy C. Ecology of the rare microbial biosphere of the  
195 Arctic Ocean. *Proc Natl Acad Sci USA*. 2009;106(52):22427-32; doi: 10.1073/pnas.0908284106.
- 196 9. Reveillaud J, Maignien L, Murat Eren A, Huber JA, Apprill A, Sogin ML, et al. Host-specificity among  
197 abundant and rare taxa in the sponge microbiome. *ISME J*. 2014;8(6):1198-209; doi:  
198 10.1038/ismej.2013.227.
- 199 10. Logares R, Audic S, Bass D, Bittner L, Boutte C, Christen R, et al. Patterns of rare and abundant marine  
200 microbial eukaryotes. *Current biology : CB*. 2014;24(8):813-21; doi: 10.1016/j.cub.2014.02.050.
- 201 11. Campbell BJ, Yu L, Heidelberg JF, Kirchman DL. Activity of abundant and rare bacteria in a coastal  
202 ocean. *Proc Natl Acad Sci USA*. 2011;108(31):12776-81; doi: 10.1073/pnas.1101405108.

203
